# Supplementary material for: Homocysteine regulates fatty acid and lipid metabolism in yeast
Source: PubMed Central journal article supplement (PMC5900771; doi:10.1074/jbc.m117.809236), 2018-02-06
Supplement: 10.1074_M117.809236_jbc.M117.809236-1.pdf [file 10.1074_M117.809236_jbc.M117.809236-1.pdf]

Homocysteine regulates fatty acid and lipid metabolism in yeast

**Myriam Visram<sup>1</sup>, Maja Radulovic<sup>1</sup>, Sabine Steiner<sup>1</sup>, Nermina Malanovic<sup>1</sup>, Thomas O. Eichmann<sup>1</sup>, Heimo Wolinski<sup>1</sup>, Gerald N. Rechberger<sup>1,2</sup> and Oksana Tehlivets<sup>1\*</sup>**

**Figure 1S.** Expression of the AltPW suppresses the deregulation of lipid metabolism in the yeast *sah1* mutant.

**Figure 2S.** Expression of the AltPW suppresses the deregulation of lipid metabolism in Hcy-supplemented wild type yeast.

**Figure S1**

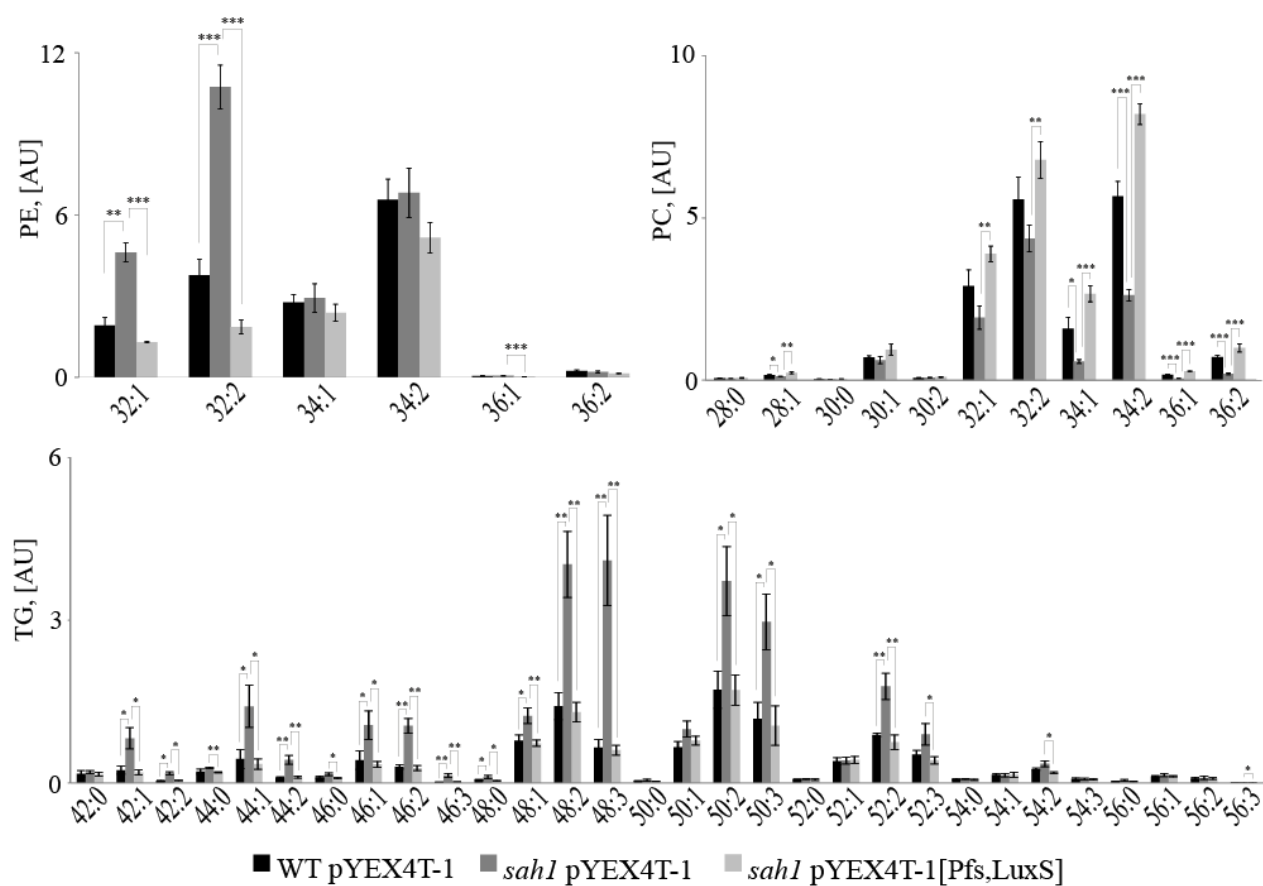

**Figure 1S. Expression of the AltPW suppresses the deregulation of lipid metabolism in the yeast *sah1* mutant.** Species distribution of PE, PC and TG. Logarithmic-phase wild type and the *sah1* mutant expressing the AltPW or carrying the empty plasmid were cultivated in SD-Ura medium, reinoculated in the same medium supplemented or not with 0.05 mM CuSO<sub>4</sub> and cultivated for 6 h before lipid extraction. TG, PE and PC were normalized to ISTDs. Data only for strains grown in the absence of additional CuSO<sub>4</sub> supplementation are shown. Data are mean ± SD from three independent experiments (\*\*\*,  $p < 0.001$ ; \*\*,  $p < 0.01$ ; \*,  $p < 0.05$ ).

**Figure S2**

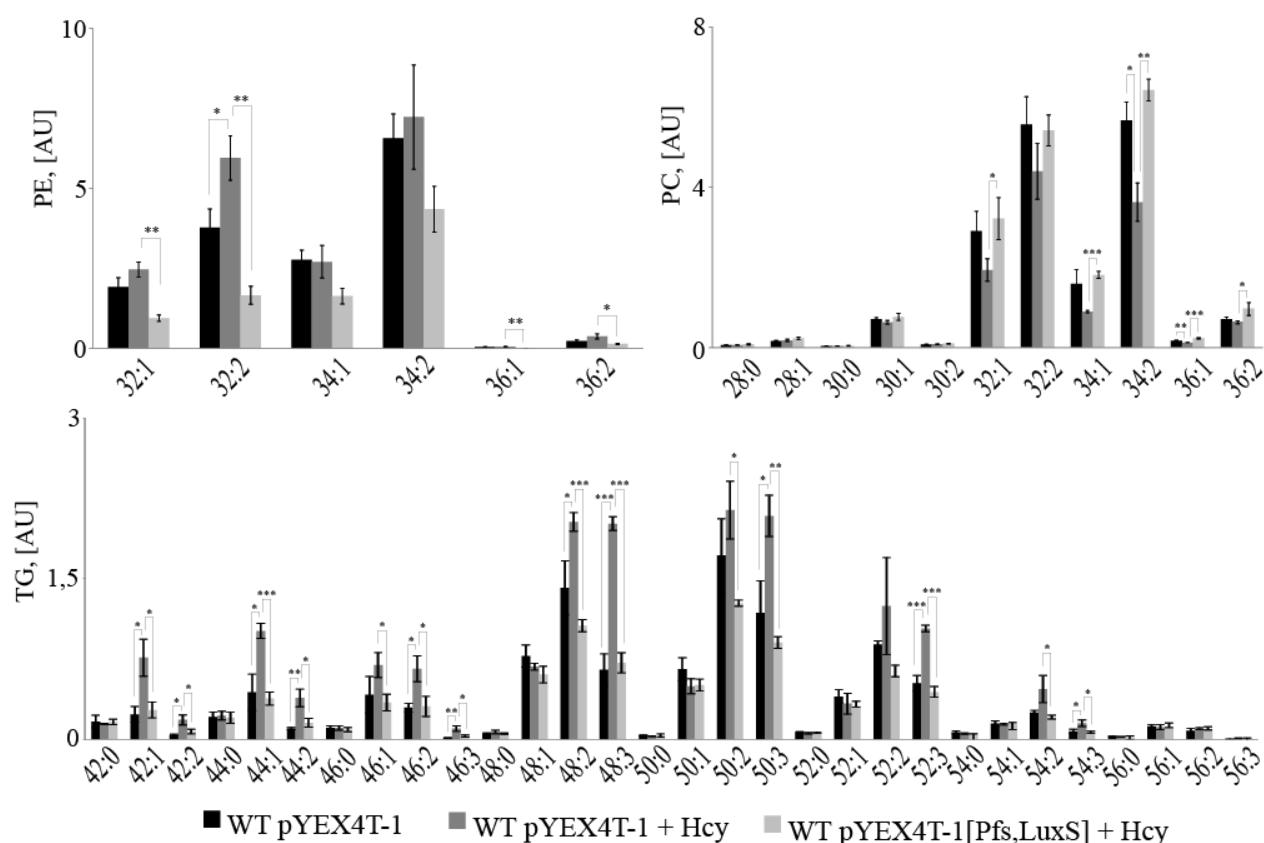

**Figure 2S. Expression of the AltPW suppresses the deregulation of lipid metabolism in Hcy-supplemented wild type yeast.** Species distribution of PE, PC and TG. Logarithmic-phase wild type expressing the AltPW or carrying the empty plasmid was cultivated in SD-Ura medium, reinoculated into same medium supplemented or not with 1 mM Hcy in the absence of additional  $\text{CuSO}_4$  supplementation and cultivated for 6 h before lipid extraction. TG, PE and PC were normalized to ISTDs. Data are mean  $\pm$  SD from three independent experiments (\*\*\*,  $p < 0.001$ ; \*\*,  $p < 0.01$ ; \*,  $p < 0.05$ ).
